# Supplementary material for: Absence of phonon gap driven ultralow lattice thermal conductivity in half-Heusler LuNiBi
Source: Royal Society of Chemistry journal article supplement (doi:10.1039/d1tc02819g), 2021-01-01
Supplement: d1tc02819g1.pdf [file d1tc02819g1.pdf]

## Supplementary Information

# Absence of phonon gap driven ultralow lattice thermal conductivity in half-Heusler LuNiBi

Xiaoxia Yu<sup>a</sup>, Jiawang Hong<sup>a, \*</sup>

<sup>a</sup> School of Aerospace Engineering, Beijing Institute of Technology, Beijing 100081, China

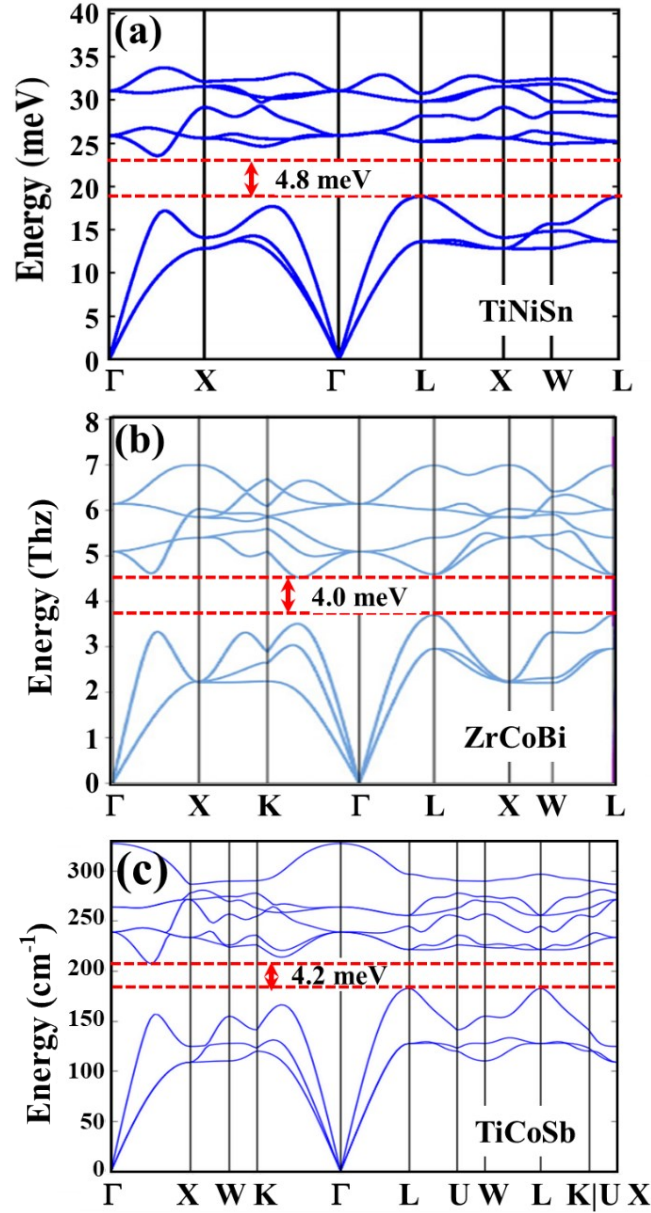

**Figure S1.** The phonon dispersion for half-Heusler of TiNiSn<sup>1</sup>, ZrCoBi<sup>2</sup> and TiCoSb<sup>3</sup>.

## 1. Two-channel Phonon Transport Model

To understand the physical mechanism of the two-channel phonon transport model, distribution of the mean free path (MFP) at room temperature for two half-Heusler compounds is shown in **Figure S2a**. The most prominent feature here is that a considerable portion of mean free path are smaller than the minimum atomic distance or the so-called Ioffe-Regel limit, which can be ascribed to the dual effect of short lifetime and small phonon velocity. This result suggests that the phonon Boltzmann transport equation methodology is no longer appropriate, since phonons are often considered to be “ill defined” in this case.<sup>4, 5</sup> According to two-channel phonon transport model, there is a coexistence of a phonon conduction channel ( $\kappa_{\text{latt}}$ ) and the

hopping channel of localized vibrations ( $\kappa_{\text{hop}}$ ) for the crystalline materials, particularly with loosely bound atoms. The former signifies the thermal transport carried by the “well-defined” phonon modes, whose MFP is larger than the lattice parameters, while the latter denotes the direct energy transfer between localized atomic vibrations, recognized as the “ill-defined” phonon modes, whose MFP is smaller than that of Ioffe-Regel limit. The “well-defined” phonon modes are commonly described by the Boltzmann transport equation methods. While the thermal conductivity of “ill-defined” phonon is calculated via the Cahill-Watson-Pohl model.<sup>5</sup> Note that the  $\kappa_{\text{latt}}$  obtained here does not subtract the contribution from phonons with MFPs less than the Ioffe-Regel limit (0.3 nm) both for LuNiBi and YNiBi because that the phonons with MFP less than the Ioffe-Regel limit give a negligible contribution for  $\kappa_{\text{latt}}$  as shown in **Figure S2b**.

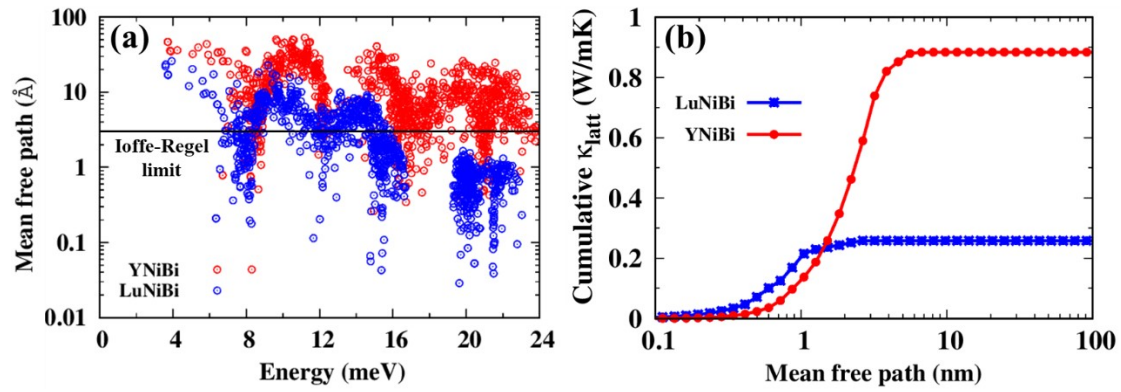

**Figure S2.** (a) Phonon frequency dependent mean free paths and (b) mean free paths dependent cumulative thermal conductivity for LuNiBi and YNiBi at room temperature. The black line marks the Ioffe-Regel limit defined by the average atomic distance in LuNiBi.

**Table S1.** Comparison of thermal conductivity at room temperature for Selected Materials in Fig. 1a. The values are theoretical results except for explicit indication of “exp” in the table. (Unit: W/mK)

| Structure | $\kappa_{\text{latt}}$                       | Structure                          | $\kappa_{\text{latt}}$                      |
|-----------|----------------------------------------------|------------------------------------|---------------------------------------------|
| LuNiBi    | 0.26                                         | Fe <sub>2</sub> VAl                | 23.00 <sup>6</sup> , 28.00 <sup>7</sup> exp |
| YNiBi     | 0.88                                         | Ba <sub>2</sub> AuBi               | 3.60 <sup>8</sup>                           |
| HfRhSb    | 17.35 <sup>9</sup>                           | Ba <sub>2</sub> AuAs               | 4.70 <sup>8</sup>                           |
| FeNbSb    | 18.00 <sup>10</sup> , 27.00 <sup>11</sup>    | Sr <sub>2</sub> AuBi               | 4.20 <sup>8</sup>                           |
| FeVSb     | 12.20 <sup>12</sup>                          | Sr <sub>2</sub> AuAs               | 5.40 <sup>8</sup>                           |
| TiCoSb    | 25.00 <sup>13</sup>                          | Ca <sub>2</sub> AuBi               | 4.80 <sup>8</sup>                           |
| TiNiSn    | 15.29 <sup>14</sup> , 7.80 <sup>15</sup> exp | Ca <sub>2</sub> HgPb               | 6.10 <sup>8</sup>                           |
| ScNiSb    | 19.50 <sup>11</sup>                          | CoSb <sub>3</sub>                  | 11.50 <sup>16</sup>                         |
| ScNiBi    | 14.30 <sup>11</sup>                          | SrRu <sub>4</sub> As <sub>12</sub> | 0.47 <sup>17</sup> exp                      |
| ZrNiSn    | 13.40 <sup>18</sup> , 5.90 <sup>19</sup> exp | CeFe <sub>4</sub> As <sub>12</sub> | 3.80 <sup>20</sup> exp                      |
| ZrNiPb    | 13.87 <sup>14</sup>                          | BaCo <sub>4</sub> Sb <sub>12</sub> | 6.10 <sup>16</sup>                          |

|        |                                               |                                                   |                                             |
|--------|-----------------------------------------------|---------------------------------------------------|---------------------------------------------|
| ZrCoSb | 23.06 <sup>21</sup> , 19.86 <sup>22</sup> exp | YbFe <sub>4</sub> Sb <sub>12</sub>                | 0.34 <sup>23</sup>                          |
| ZrCoBi | 17.70 <sup>14</sup> , 9.00 <sup>24</sup> exp  | K <sub>8</sub> Al <sub>8</sub> Si <sub>38</sub>   | 1.20 <sup>25</sup> exp                      |
| LaPdSb | 6.50 <sup>26</sup> exp                        | Si <sub>2</sub> Ge                                | 0.28 <sup>27</sup>                          |
| GdPdSb | 4.90 <sup>26</sup> exp                        | Ba <sub>8</sub> Ga <sub>16</sub> Ge <sub>30</sub> | 2.00 <sup>28</sup>                          |
| HfNiSn | 18.50 <sup>14</sup>                           | BiCuSeO                                           | 0.55 <sup>29</sup>                          |
| TaIrSn | 18.80 <sup>30</sup>                           | NaCo <sub>2</sub> O <sub>4</sub>                  | 3.94 <sup>31</sup>                          |
| TaFeSb | 28.15 <sup>14</sup>                           | SrHfO <sub>3</sub>                                | 4.54 <sup>32</sup> exp                      |
| TaCoSn | 19.75 <sup>14</sup>                           | SrRuO <sub>3</sub>                                | 5.72 <sup>32</sup> exp                      |
| TiPdS  | 5.47 <sup>33</sup>                            | PbTe                                              | 1.50 <sup>34</sup> , 2.00 <sup>35</sup> exp |
| NbCoSn | 6.50 <sup>36</sup> exp                        | SnSe                                              | 0.72( <i>b</i> ) <sup>37</sup> exp          |

## References

- 1 A. A. Musari, B. I. Adetunji, P. O. Adebambo and G. A. Adebayo, *Mater. Today Commun.*, 2020, **22**, 100671.
- 2 G. Surucu, M. Isik, A. Candan, X. Wang and H. H. Gullu, *Physica B: Condens. Matter*, 2020, **587**, 412146.
- 3 Data from the internet <https://materialsproject.org/materials/mp-5967/>.
- 4 P. B. Allen and J. L. Feldman, *Phys. Rev. B*, 1993, **48**, 12581–12588.
- 5 D. G. Cahill and R. O. Pohl, *Solid State Commun.*, 1989, **70**, 927–930.
- 6 S. Anand, R. Gurunathan, T. Soldi, L. Borgsmiller, R. Orenstein and G. J. Snyder, *J. Mater. Chem. C*, 2020, **8**, 10174–10184.
- 7 Y. Nishino, S. Deguchi and U. Mizutani, *Phys. Rev. B*, 2006, **74**, 115115.
- 8 J. He, M. Amsler, Y. Xia, S. S. Naghavi, V. I. Hegde, S. Hao, S. Goedecker, V. Ozoliņš and C. Wolverton, *Phys. Rev. Lett.*, 2016, **117**, 046602.
- 9 K. Kaur, R. Kumar and D. P. Rai, *J. Alloys Compd.*, 2018, **763**, 1018–1023.
- 10 C. Fu, S. Bai, Y. Liu, Y. Tang, L. Chen, X. Zhao and T. Zhu, *Nat. Commun.*, 2015, **6**, 8144.
- 11 J. Zhou, H. Zhu, T.-H. Liu, Q. Song, R. He, J. Mao, Z. Liu, W. Ren, B. Liao, D. J. Singh, Z. Ren and G. Chen, *Nat. Commun.*, 2018, **9**, 1721.
- 12 T. J. Zhu, C. G. Fu, H. H. Xie, Y. T. Liu, B. Feng, J. Xie and X. B. Zhao, *EPL*, 2013, **104**, 46003.
- 13 T. Sekimoto, K. Kurosaki, H. Muta and S. Yamanaka, *Mater. Trans.*, 2006, **47**, 1445–1448.
- 14 S. Anand, M. Wood, Y. Xia, C. Wolverton and G. J. Snyder, *Joule*, 2019, **3**, 1226–1238.
- 15 S. Bhattacharya, M. J. Skove, M. Russell, T. M. Tritt, Y. Xia, V. Ponnambalam, S. J. Poon and N. Thadhani, *Phys. Rev. B*, 2008, **77**, 184203.
- 16 W. Li and N. Mingo, *Phys. Rev. B*, 2014, **89**, 184304.
- 17 T. M. Bhat, M. Nabi and D. C. Gupta, *Physica B: Condens. Matter.*, 2020, **592**, 412209.
- 18 L. Andrea, G. Hug and L. Chaput, *J. Phys.: Condens. Matter.*, 2015, **27**, 425401.
- 19 C. Uher, J. Yang, S. Hu, D. T. Morelli and G. P. Meisner, *Phys. Rev. B*, 1999, **59**, 8615–8621.
- 20 A. Watcharapasorn, R. S. Feigelson, T. Caillat, A. Borshchevsky, G. J. Snyder and J.-P. Fleurial, *J. Appl. Phys.*, 2002, **91**, 1344–1348.
- 21 H. Joshi, D. P. Rai, A. Laref and R. K. Thapa, *Mater. Res. Express*, 2019, **6**, 066307.
- 22 R. He, T. Zhu, Y. Wang, U. Wolff, J.-C. Jaud, A. Sotnikov, P. Potapov, D. Wolf, P. Ying, M. Wood, Z. Liu, L. Feng, N. P. Rodriguez, G. J. Snyder, J. C. Grossman, K. Nielsch and G. Schierning, *Energy Environ. Sci.*, 2020, **13**, 5165–5176.
- 23 W. Li and N. Mingo, *Phys. Rev. B*, 2015, **91**, 144304.
- 24 H. Zhu, R. He, J. Mao, Q. Zhu, C. Li, J. Sun, W. Ren, Y. Wang, Z. Liu, Z. Tang, A. Sotnikov, Z. Wang, D. Broido, D. J. Singh, G. Chen, K. Nielsch and Z. Ren, *Nat. Commun.*, 2018, **9**, 2497.

- 25 F. Sui and S. M. Kauzlarich, *Chem. Mater.*, 2016, **28**, 3099–3107.
- 26 A. Mukhopadhyay, N. Lakshminarasimhan and N. Mohapatra, *J. Phys. D: Appl. Phys.*, 2018, **51**, 265004.
- 27 J. Shen, T. Xie, L. Zhang, P. Wang and Z. Fang, *Sci Rep*, 2020, **10**, 3068.
- 28 A. F. May, E. S. Toberer, A. Saramat and G. J. Snyder, *Phys. Rev. B*, 2009, **80**, 125205.
- 29 L.-D. Zhao, J. He, D. Berardan, Y. Lin, J.-F. Li, C.-W. Nan and N. Dragoe, *Energy Environ. Sci.*, 2014, **7**, 2900–2924.
- 30 K. Kaur and R. Kumar, *Phys. Lett. A*, 2017, **381**, 3760–3765.
- 31 K. Kurosaki, H. Muta, M. Uno and S. Yamanaka, *J. Alloys Compd.*, 2001, **315**, 234–236.
- 32 S. Yamanaka, T. Maekawa, H. Muta, T. Matsuda, S. Kobayashi and K. Kurosaki, *Solid. State. Chem.*, 2004, **177**, 3484–3489.
- 33 K. Kaur, *EPL*, 2017, **117**, 47002.
- 34 J. He, Y. Xia, S. S. Naghavi, V. Ozoliņš and C. Wolverton, *Nat. Commun.*, 2019, **10**, 719.
- 35 H. Wang, A. D. LaLonde, Y. Pei and G. J. Snyder, *Adv. Funct. Mater.*, 2013, **23**, 1586–1596.
- 36 Y. Kimura, Y. Tamura and T. Kita, *Appl. Phys. Lett.*, 2008, **92**, 012105.
- 37 L.-D. Zhao, S.-H. Lo, Y. Zhang, H. Sun, G. Tan, C. Uher, C. Wolverton, V. P. Dravid and M. G. Kanatzidis, *Nature*, 2014, **508**, 373–377.
